# Supplementary material for: Lay support for pregnant women with social risk: a randomised controlled trial
Source: PubMed Central journal article supplement (PMC4785315; doi:10.1136/bmjopen-2015-009203), 2016-03-02
Supplement: bmjopen-2015-009203supp_tables.pdf [file bmjopen-2015-009203supp_tables.pdf]

**Supplementary tables – Lay support for pregnant women with social risk: randomised controlled trial**

**Supplementary Table 1: Maternal birth secondary outcomes**

|                                                                 | <b>POW n=600, 606 infants (6 multiples)</b> | <b>Standard Care n=613, 619 infants (6 multiples)</b> | <b>Mean Difference (95% CI)</b> | <b>P=</b> |
|-----------------------------------------------------------------|---------------------------------------------|-------------------------------------------------------|---------------------------------|-----------|
| Length of labour (onset to time of birth) mins <sup>&amp;</sup> | n=595                                       | n=603                                                 |                                 |           |
| Median (IQR)                                                    | 269 [115, 531]                              | 272 [95, 501]                                         | NA                              | 0.39      |
| Mode of birth <sup>&amp;</sup>                                  | n=604                                       | n=616                                                 | NA                              | 0.72      |
| Spontaneous vaginal birth                                       | 353 (58%)                                   | 347 (56%)                                             |                                 |           |
| Instrumental birth                                              |                                             |                                                       |                                 |           |
| Forceps                                                         | 55 (9%)                                     | 58 (9%)                                               |                                 |           |
| Ventouse                                                        | 57 (9%)                                     | 50 (8%)                                               |                                 |           |
| Caesarean section                                               |                                             |                                                       |                                 |           |
| Elective                                                        | 17 (3%)                                     | 19 (3%)                                               |                                 |           |
| Emergency                                                       | 122 (20%)                                   | 142 (23%)                                             |                                 |           |
| Estimated blood loss                                            | n=596                                       | n=609                                                 | NA                              | 0.31      |
| Up to 500mls                                                    | 459 (77%)                                   | 446 (73%)                                             |                                 |           |
| 500–1000mls                                                     | 119 (20%)                                   | 140 (23%)                                             |                                 |           |
| >1000mls                                                        | 18 (3%)                                     | 23 (4%)                                               |                                 |           |
| Perineal trauma                                                 | 342 (57%)                                   | 334 (54%)                                             | 2.4 (–3.2, 8.1)                 | 0.39      |
| Degree of laceration                                            | n=220*                                      | n=210                                                 | NA                              | 0.56      |
| First degree                                                    | 42 (19%)                                    | 48 (23%)                                              |                                 |           |
| Second degree                                                   | 161 (73%)                                   | 147 (70%)                                             |                                 |           |
| Third or fourth degree                                          | 16 (8%)                                     | 15 (7%)                                               |                                 |           |
| Incidence of maternal morbidity                                 |                                             |                                                       |                                 |           |
| Episiotomy                                                      | 152/598 (25%)                               | 144/609 (24%)                                         | 1.8 (–3.0, 6.7)                 | 0.45      |
| Postpartum haemorrhage                                          | 137/596 (23%)                               | 162/610 (27%)                                         | –3.6 (–8.4, 1.3)                | 0.15      |
| Maternal admission to HDU/ITU                                   | 21/597 (3%)                                 | 24/608 (4%)                                           | –0.4 (–2.6, 1.7)                | 0.70      |
| Hysterectomy                                                    | 1/598 (<1%)                                 | 0/610 (0%)                                            | 0.2 (–0.2, 0.1)                 | 0.31      |
| Uterine Rupture                                                 | 0/598 (0%)                                  | 0/610 (0%)                                            | NA                              | NA        |
| Shoulder dystocia                                               | 4/598 (1%)                                  | 3/610 (<1%)                                           | –0.2 (–0.7, 0.1)                | 0.68      |
| Length of stay in hospital (days)                               |                                             |                                                       |                                 |           |
| Median (IQR)                                                    | 2 [1,4]                                     | 2 [1,4]                                               | NA                              | 0.84      |

\*One un-specified degree; NA either no events or non-parametric test (Rank sum). Values are numbers (percentages) unless otherwise stated.

**Supplementary Table 2: Neonatal outcomes**

| <b>Pre-specified perinatal composite outcome</b> | <b>POW<br/>n=604</b>        | <b>Standard Care n=616</b>            | <b>Relative risk<br/>(95% CI)</b>   | <b>P=</b> |
|--------------------------------------------------|-----------------------------|---------------------------------------|-------------------------------------|-----------|
| Perinatal mortality                              | 6 (1%)                      | 3 (<1%)                               | 2.04 (0.51, 8.12)                   | 0.30      |
| Preterm birth before 34 weeks                    | 20 (3%)                     | 19 (3%)                               | 1.07 (0.58, 1.99)                   | 0.82      |
| Birth weight 10 <sup>th</sup> centile or below   | 127 (21%)                   | 141 (23%)                             | 0.92 (0.74, 1.14)                   | 0.43      |
| Admission to neonatal unit                       | 77 (13%)                    | 81 (13%)                              | 0.97 (0.72, 1.30)                   | 0.83      |
| Any outcome                                      | 180 (30%)                   | 204 (30%)                             | 0.90 (0.76, 1.06)                   | 0.24      |
| <b>2 or more social risk factors</b>             |                             |                                       |                                     |           |
| Perinatal mortality                              | 4 (1%)                      | 2 (<1%)                               | 1.97(0.36, 10.71)                   | 0.42      |
| Preterm birth before 34 weeks                    | 14 (3%)                     | 16 (4%)                               | 0.86 (0.43, 1.75)                   | 0.68      |
| Birth weight 10 <sup>th</sup> centile or below   | 95 (21%)                    | 106 (24%)                             | 0.88 (0.69, 1.13)                   | 0.32      |
| Admission to neonatal unit                       | 58 (13%)                    | 62 (14%)                              | 0.92 (0.66, 1.29)                   | 0.64      |
| Any outcome                                      | 133 (30%)                   | 153 (35%)                             | 0.86 (0.71, 1.03)                   | 0.11      |
| <i>NB: Values are numbers (%)</i>                |                             |                                       |                                     |           |
| <b>Neonatal secondary outcomes</b>               | <b>POW<br/>n=606 babies</b> | <b>Standard Care n=619<br/>babies</b> | <b>Mean Difference<br/>(95% CI)</b> | <b>P=</b> |
| Apgar score at 5 minutes (mean, SD)              | 9 (0.04) n=596              | 9 (0.03) n=613                        | -0.04 (-0.15, 0.06)                 | 0.41      |
| Number with Apgar <7 at 5 minutes                | 11 (1.85) n=596             | 9 (1.47) n=613                        | 0.3 (-1.0, 1.8)                     | 0.61      |
| Arterial cord blood gases taken                  | 307 (51%)                   | 308 (50%) n=614                       | 0.8 (-4.5, 6.4)                     | 0.77      |
| Number with arterial cord Ph <7.05               | 4 (1%)                      | 7 (2%)                                | -1.0 (-3.2, 1.2)                    | 0.36      |
| Breastfeeding initiation                         | 300 (51%) n=595             | 302 (49%) n=615                       | 1.3 (-4.3, 6.9)                     | 0.65      |
| Method of Feeding at discharge                   | n=584                       | n=606                                 |                                     |           |
| Exclusive breast                                 | 285 (49%)                   | 303 (50%)                             | NA                                  | 0.90      |
| Any breast                                       | 56 (10%)                    | 55 (9%)                               |                                     |           |
| Bottle                                           | 243 (42%)                   | 248 (41%)                             |                                     |           |
| Length of stay in hospital (days)                | 3 [1, 4]                    | 2 [1.5, 4]                            | NA                                  | 0.75      |
| Admission to NNU                                 | 77 (13%)                    | 81 (13%)                              | -0.04 (-4.2, 3.3)                   | 0.83      |
| Birth weight                                     | n=604                       | n=616                                 |                                     |           |
| Median, IQR                                      | 3222 [2870, 3545]           | 3207 [2805, 3535]                     | NA                                  | 0.27      |
| <1500g                                           | 13 (2%)                     | 13 (2%)                               | NA                                  | 0.99      |
| 1500-2499g                                       | 59 (10%)                    | 59 (10%)                              |                                     |           |
| ≥2500g                                           | 532 (88%)                   | 544 (88%)                             |                                     |           |

|                                                              |                         |                   |                               |      |
|--------------------------------------------------------------|-------------------------|-------------------|-------------------------------|------|
|                                                              |                         |                   |                               |      |
| Gestational age                                              | n=604                   | n=616             |                               |      |
| Median, IQR                                                  | 40 [38-71, 40-86]       | 40 [38-71, 40-86] | NA                            | 0-59 |
| <28 weeks                                                    | 6 (1%)                  | 4 (1%)            | NA                            | 0-81 |
| 28–31+6 days                                                 | 8 (15%)                 | 8 (1%)            |                               |      |
| 32–36+6 days                                                 | 37 (6%)                 | 32 (5%)           |                               |      |
| ≥37 weeks                                                    | 553 (92%)               | 572 (93%)         |                               |      |
| <b>Neonatal outcomes for those admitted to Neonatal Unit</b> | <b>POW<br/>n=77</b>     |                   | <b>Standard Care<br/>n=81</b> |      |
| Birth weight ( <i>grams</i> )                                | 2585 [1870, 3155], n=77 |                   | 2800 [1900, 3460], n=80       |      |
| Gestational Age ( <i>weeks and days</i> )                    | 38 [34, 40]             |                   | 38 [35, 40]                   |      |
| Reason for admission to NNU                                  |                         |                   |                               |      |
| Congenital abnormality                                       | 6 (8%)                  |                   | 8 (10%)                       |      |
| Feeding problems                                             | 1 (1%)                  |                   | 3 (4%)                        |      |
| Hypoglycaemia                                                | 4 (5%)                  |                   | 0 (0%)                        |      |
| Hypothermia                                                  | 1 (1%)                  |                   | 2 (2%)                        |      |
| Infection/sepsis                                             | 9 (12%)                 |                   | 22 (27%)                      |      |
| IUGR                                                         | 6 (8%)                  |                   | 5 (6%)                        |      |
| Jaundice                                                     | 4 (5%)                  |                   | 3 (4%)                        |      |
| Neurological problems / seizures                             | 0 (0%)                  |                   | 0 (0%)                        |      |
| Prematurity <28 weeks                                        | 9 (12%)                 |                   | 8 (8%)                        |      |
| Prematurity 28–32 weeks                                      | 3 (4%)                  |                   | 4 (5%)                        |      |
| Prematurity >32 weeks                                        | 5 (6%)                  |                   | 10 (12%)                      |      |
| Respiratory problems                                         | 16 (21%)                |                   | 11 (13%)                      |      |
| Substance/alcohol misuse                                     | 4 (5%)                  |                   | 4 (5%)                        |      |
| Other                                                        | 8 (11%)                 |                   | 1 (1%)                        |      |
| Length of stay in NNU                                        |                         |                   |                               |      |
| Median (IQR)                                                 | 7 [5, 20]               |                   | 7 [4, 23]                     |      |
| Duration of Intensive care (level 3) (days)                  | 0 [0, 3]                |                   | 0 [0, 2]                      |      |
| Duration of high dependency care (level 2) (days)            | 0 [0, 0]                |                   | 0 [0, 0]                      |      |
| Duration of special care (level 1) (days)                    | 5 [2,14]                |                   | 4 [0, 7]                      |      |
| Duration of transitional care (days)                         | 0 [0, 0]                |                   | 0 [0, 0]                      |      |
| Oxygen at 36 weeks post-conceptual age                       | 6 (8%)                  |                   | 5 (6%)                        |      |

|                                                                                                 |          |                 |
|-------------------------------------------------------------------------------------------------|----------|-----------------|
| If yes was this an acute episode?                                                               | 3 (50%)  | 4 (80%)         |
| Baby discharged on oxygen?                                                                      | 0 (0%)   | 0 (0%)          |
| Cerebral US Scan performed during the baby's stay                                               | 19 (25%) | 15 (19%)        |
| Ventricular dilation >4mm above the 97 <sup>th</sup> centile                                    | 1 (1%)   | 1 (1%)          |
| Intraparenchymal lesion                                                                         | 2 (3%)   | 1 (1%)          |
| Periventricular leukomalacia                                                                    | 0 (0%)   | 1 (1%)          |
| Cerebral atrophy                                                                                | 0 (0%)   | 0 (0%)          |
| Intraventricular haemorrhage (IVH) causing ventricular distension                               | 0 (0%)   | 2 (2%)          |
| Intraventricular haemorrhage (IVH) Grade I-II                                                   | 2 (3%)   | 1 (1%)          |
| Necrotising enterocolitis                                                                       | 0 (0%)   | 1 (1%)          |
| Stage 1                                                                                         | 0 (0%)   | 0 (0%)          |
| Stage II or III                                                                                 | 0 (0%)   | 1 (1%)          |
| Infection that required either 5 days IV antibiotic only and/or positive neonatal blood culture | 27 (35%) | 26 (32%)        |
| Retinopathy Of Prematurity (ROP)                                                                | 0 (0%)   | 1 (1%)          |
| Stage 1                                                                                         | 0 (0%)   | 0 (0%)          |
| Stage 2                                                                                         | 0 (0%)   | 0 (0%)          |
| Stage 3                                                                                         | 0 (0%)   | 1 (1%)          |
| Stage 4                                                                                         | 0 (0%)   | 0 (0%)          |
| Stage 5                                                                                         | 0 (0%)   | 0 (0%)          |
| Require treatment                                                                               | 0 (0%)   | 1 (1%)          |
| Death                                                                                           | 0 (0%)   | 1 (1%)          |
| Most likely cause:                                                                              | NA       | IVH prematurity |

Values are numbers (percentages) unless otherwise stated.

**Supplementary Table 3: Maternal psychological outcomes at 8 weeks after birth**

| <b>Self-efficacy</b>                        | <b>POW<br/>n=476</b> | <b>Standard Care<br/>n=501</b> | <b>Mean Difference<br/>(95% CI)</b> | <b>p=</b> |
|---------------------------------------------|----------------------|--------------------------------|-------------------------------------|-----------|
| Score                                       | 22.39 (0.18)         | 21.96 (0.17)                   | 0.43 (-0.06, 0.91)                  | 0.08      |
|                                             |                      |                                |                                     |           |
| <b>Number of social risk factors</b>        |                      |                                |                                     |           |
| 1 social risk factor                        | 23.0 (0.37) n=123    | 22.6 (0.32) =153               | 0.42 (-0.54, 1.38)                  | 0.39      |
| 2 or more social risk factors               | 22.2 (0.21) n=353    | 21.7 (0.20) =348               | 0.48 (-0.08, 1.04)                  | 0.09      |
| <b>Mother-to-infant bonding<sup>1</sup></b> | <b>POW<br/>n=457</b> | <b>Standard Care<br/>n=489</b> | <b>Mean Difference<br/>(95% CI)</b> | <b>p=</b> |
| Score                                       | 1.42 (0.11)*         | 1.73 (0.11)                    | -0.30 (-0.61, 0.00)                 | 0.05      |
|                                             |                      |                                |                                     |           |
| <b>Number of social risk factors</b>        |                      |                                |                                     |           |
| 1 social risk factor                        | 1.34 (0.21) n=120    | 1.55 (0.20) n=152              | -0.29 (-0.77, 0.36)                 | 0.48      |
| 2 or more social risk factors               | 1.45 (0.12) n=337    | 1.81 (0.14) n=337              | -0.35 (-0.72, 0.01)                 | 0.06      |

\*One observation missing outcome on mother to infant bonding. Scales range from 0–24 where higher scores indicate worse mother-to-infant bonding  
Values are mean, (SE).

**Supplementary Table 4: Child Health Assessment and primary immunisation**

|                                      | <b>POW<br/>n=600</b> | <b>Standard care<br/>n=613</b> | <b>Difference (99% CI)</b> | <b>P=</b> |
|--------------------------------------|----------------------|--------------------------------|----------------------------|-----------|
| Attendance at 6–8 week routine check | n= 464 (77%)         | n= 455 (74%)                   |                            |           |
| Attended 6–8 week check              | 427 (71%)            | 405 (66%)                      | 0.03 (-0.02, 0.08)         | 0.1427    |
|                                      |                      |                                |                            |           |
| Primary immunisation                 | n= 581 (97%)         | n= 591 (96%)                   |                            |           |
| Not given                            | 37 (6%)              | 48 (8%)                        |                            | 0.459     |
| Partial                              | 81 (14%)             | 75 (12%)                       |                            |           |
| Complete                             | 463 (77%)            | 468 (76%)                      |                            |           |
|                                      |                      |                                |                            |           |
| Feeding method at 6 weeks            | n= 540 (90%)         | n= 537 (88%)                   |                            |           |
| Formula                              | 329 (55%)            | 346 (56%)                      |                            | 0.501     |
| Mixed                                | 101 (17%)            | 92 (15%)                       |                            |           |
| Exclusive breast                     | 110 (18%)            | 99 (16%)                       |                            |           |

Values are numbers (percentages) unless otherwise stated.

**Supplementary Table 5: Description of POW contact**

| <b>POW contact</b>                                                                                               | <b>Total</b> | <b>Antenatally</b> | <b>Postnatally</b> |
|------------------------------------------------------------------------------------------------------------------|--------------|--------------------|--------------------|
| Total number of contacts                                                                                         | n=17534      | n=13516 (77%)      | n=4018 (23%)       |
| Median (IQR)                                                                                                     | 25 [15, 5]   | 19 [12, 27]        | 6 [3, 10]          |
| Median face-to-face contacts (IQR)                                                                               | 7 [3, 12]    | 5 [2, 8]           | 3 [1, 4]           |
|                                                                                                                  |              |                    |                    |
| Method of contact                                                                                                | n=17534      | n=13516 (77%)      | n=4018 (23%)       |
| Face to face                                                                                                     | 4667 (27%)   | 3465 (26%)         | 1202 (30%)         |
| Phone                                                                                                            | 4368 (25%)   | 3449 (26%)         | 919 (23%)          |
| Other (group, letter, voicemail, spoke to family member, text, referral, discussion with professional, research) | 8041 (46%)   | 6256 (46%)         | 1785 (44%)         |
| Woman did not attend face to face                                                                                | 451 (3%)     | 341 (3%)           | 110 (3%)           |
|                                                                                                                  |              |                    |                    |
| Duration of face-to-face contacts                                                                                | n=4667       | n=3465 (74%)       | n=1202 (26%)       |
| Under 30 mins                                                                                                    | 132 (3%)     | 100 (3%)           | 32 (3%)            |
| 30 mins – 1 hour                                                                                                 | 1724 (37%)   | 1310 (38%)         | 414 (34%)          |
| 1-2 hours                                                                                                        | 2207 (47%)   | 1595 (46%)         | 612 (51%)          |
| Over 2 hours                                                                                                     | 592 (13%)    | 451 (13%)          | 141 (12%)          |
|                                                                                                                  |              |                    |                    |
| Venue for contact (Face to face or group)                                                                        | n=4667       | n=3465 (74%)       | n=1202 (26%)       |
| Woman's home                                                                                                     | 3925 (84%)   | 2857 (82%)         | 1068 (89%)         |
| Other                                                                                                            | 722 (15%)    | 593 (17%)          | 129 (11%)          |
|                                                                                                                  |              |                    |                    |
| Duration of other contacts                                                                                       | 12860        | 10046 (78%)        | 2814 (22%)         |
| Under 30 mins                                                                                                    | 12048 (94%)  | 9446 (94%)         | 2602 (92%)         |
| 30 mins or more                                                                                                  | 802 (6%)     | 594 (6%)           | 208 (7%)           |
|                                                                                                                  |              |                    |                    |
| Number of women allocated the addition of a POW                                                                  | n=662        | n=662              | n=662              |
| Number of women with over 10 face to face contacts                                                               | 194 (29%)    | 109 (16%)          | 9 (1%)             |
| Number of women with contact only by phone or letter                                                             | 3 (<1%)      | 3 (<1%)            | 98 (15%)           |
| Number of women with no contacts                                                                                 | 0 (0%)       | 0 (0%)             | 0 (0%)             |
| Number of women who disclosed additional social risk*                                                            | 83 (13%)     | 77 (12%)           | 9 (1%)             |

\*Three women disclosed additional social risk both antenatally and postnatally  
 Values are numbers (percentages) unless otherwise stated.

**Supplementary Table 6: Description of type of support given by POW**

|                                         | Total      | Antenatally   | Postnatally  |
|-----------------------------------------|------------|---------------|--------------|
| Type of support given                   | n=18888    | n=13344 (71%) | n=5544 (29%) |
| Finance/Benefit/legal                   | 3552 (19%) | 2602 (19%)    | 950 (17%)    |
| Health matters (diet/smoking/lifestyle) | 3154 (17%) | 2530 (19%)    | 624 (11%)    |
| Emotional                               | 3262 (17%) | 2420 (18%)    | 842 (15%)    |
| Housing                                 | 2865 (15%) | 2373 (18%)    | 492 (9%)     |
| Isolation                               | 1136 (6%)  | 848 (6%)      | 288 (5%)     |
| Accompany to appointment                | 743 (4%)   | 654 (5%)      | 89 (2%)      |
| Language problems: reading/writing      | 694 (4%)   | 583 (4%)      | 111 (2%)     |
| Referral to other agency                | 789 (4%)   | 541 (4%)      | 248 (4%)     |
| Social support/child protection         | 529 (3%)   | 373 (3%)      | 156 (3%)     |
| Mental health                           | 389 (2%)   | 293 (2%)      | 96 (2%)      |
| Alcohol/Substance misuse/drugs          | 90 (<1%)   | 78 (1%)       | 12 (<1%)     |
| Domestic violence                       | 62 (<1%)   | 49 (<1%)      | 13 (<1%)     |
| Breast feeding support                  | 35 (<1%)   | N/A           | 35 (1%)      |
| Breast feeding advice                   | 580 (3%)   | N/A           | 580 (10%)    |
| Bottle feeding support                  | 14 (<1%)   | N/A           | 14 (<1%)     |
| Bottle feeding advice                   | 412 (2%)   | N/A           | 412 (7%)     |
| Baby care support                       | 33 (<1%)   | N/A           | 33 (1%)      |
| Baby care advice                        | 466 (2%)   | N/A           | 466 (8%)     |
| Budgeting                               | 83 (<1%)   | N/A           | 83 (1%)      |

Values are numbers (percentages) unless otherwise stated.
